# Supplementary material for: The Role of the Leishmania infantum Infected Dogs as a Potential Reservoir Host for Toscana Virus in a Zoonotic Visceral Leishmaniasis Focus of Northern Tunisia
Source: MDPI journal article supplement (doi:10.3390/v15041012), 2023-04-20
Supplement: s1 [file s1]

| Date collection | Pool number | Number of sandflies | Sex |
|-----------------|-------------|---------------------|-----|
| 11.06.2020      | T1          | 1                   | M   |
|                 | T2          | 1                   | F   |
|                 | T3          | 2                   | M   |
| 29.06.2020      | T4          | 27                  | F   |
|                 | T5          | 15                  | M   |
|                 | T6          | 13                  | M   |
|                 | T7          | 10                  | F   |
| 16.07.2020      | T8          | 25                  | F   |
|                 | T9          | 16                  | M   |
|                 | T10         | 9                   | F   |
|                 | T11         | 6                   | M   |
|                 | T12         | 15                  | F   |
| 13.08.2020      | T13         | 11                  | M   |
|                 | T14         | 30                  | F   |
|                 | T15         | 30                  | M   |
|                 | T16         | 30                  | F   |
|                 | T17         | 28                  | M   |
|                 | T18         | 30                  | F   |
|                 | T19         | 30                  | F   |
|                 | T20         | 30                  | M   |
|                 | T21         | 28                  | F   |
|                 | T22         | 30                  | F   |
|                 | T23         | 24                  | M   |
|                 | T24         | 30                  | F   |
|                 | T25         | 30                  | F   |
|                 | T26         | 30                  | F   |
|                 | T27         | 30                  | F   |
|                 | T28         | 30                  | M   |
|                 | T29         | 30                  | F   |
|                 | T30         | 30                  | M   |
|                 | T31         | 30                  | M   |
|                 | T32         | 20                  | M   |
|                 | T33         | 30                  | F   |
|                 | T34         | 30                  | F   |
|                 | T35         | 30                  | F   |
|                 | T36         | 30                  | M   |
|                 | T37         | 30                  | M   |
|                 | T38         | 24                  | M   |
| 17.08.2020      | T39         | 30                  | F   |
|                 | T40         | 30                  | F   |
|                 | T41         | 30                  | M   |
|                 | T42         | 30                  | F   |
|                 | T43         | 30                  | F   |
|                 | T44         | 26                  | M   |
|                 | T45         | 30                  | F   |
|                 | T46         | 23                  | M   |
|                 | T47         | 30                  | F   |
|                 | T48         | 30                  | F   |

|            |     |    |   |
|------------|-----|----|---|
| 20.08.2020 | T49 | 30 | M |
|            | T50 | 30 | F |
|            | T51 | 30 | M |
|            | T52 | 30 | F |
|            | T53 | 12 | M |
|            | T54 | 30 | F |
|            | T55 | 30 | M |
|            | T56 | 30 | F |
|            | T57 | 20 | M |
|            | T58 | 30 | F |
| 24.08.2020 | T59 | 30 | M |
|            | T60 | 30 | F |
|            | T61 | 30 | F |
|            | T62 | 30 | M |
|            | T63 | 30 | F |
|            | T64 | 30 | F |
|            | T65 | 30 | M |
|            | T66 | 30 | M |
|            | T67 | 30 | F |
|            | T68 | 30 | M |
| 31.08.2020 | T69 | 30 | F |
|            | T70 | 30 | F |
|            | T71 | 30 | M |
|            | T72 | 30 | F |
|            | T73 | 30 | M |
|            | T74 | 30 | M |
|            | T75 | 30 | F |
|            | T76 | 21 | M |
|            | T77 | 30 | F |
|            | T78 | 16 | M |
| 7.09.2020  | T79 | 30 | F |
|            | T80 | 30 | F |
|            | T81 | 30 | M |
|            | T82 | 30 | F |
|            | T83 | 30 | F |
|            | T84 | 30 | F |
|            | T85 | 30 | M |
|            | T86 | 30 | M |
|            | T87 | 30 | M |
|            | T88 | 30 | F |
|            | T89 | 10 | M |
|            | T90 | 30 | F |
|            | T91 | 30 | F |
|            | T92 | 30 | F |
|            | T93 | 30 | M |
|            | T94 | 30 | F |
|            | T95 | 30 | M |
|            | T96 | 30 | F |
|            | T97 | 30 | F |
|            | T98 | 30 | M |

|            |      |    |   |
|------------|------|----|---|
|            | T99  | 30 | F |
|            | T100 | 30 | F |
|            | T101 | 30 | M |
|            | T102 | 30 | F |
|            | T103 | 30 | M |
|            | T104 | 30 | M |
|            | T105 | 30 | F |
|            | T106 | 30 | M |
|            | T107 | 30 | M |
|            | T108 | 30 | M |
|            | T109 | 30 | F |
|            | T110 | 30 | M |
|            | T111 | 30 | M |
|            | T112 | 30 | F |
|            | T113 | 30 | F |
|            | T114 | 30 | M |
|            | T115 | 30 | F |
|            | T116 | 29 | M |
|            | T117 | 24 | F |
| 15.09.2020 | T118 | 30 | M |
|            | T119 | 30 | F |
|            | T120 | 30 | M |
|            | T121 | 30 | F |
|            | T122 | 30 | M |
|            | T123 | 30 | F |
|            | T124 | 30 | M |
|            | T125 | 30 | M |
|            | T126 | 30 | F |
|            | T127 | 30 | F |
|            | T128 | 30 | F |
|            | T129 | 30 | M |
|            | T130 | 30 | F |
|            | T131 | 24 | M |
|            | T132 | 30 | F |
|            | T133 | 30 | F |
|            | T134 | 30 | F |
| 21.09.2020 | T135 | 30 | M |
|            | T136 | 30 | F |
|            | T137 | 30 | M |
|            | T138 | 19 | M |
|            | T139 | 30 | F |
|            | T140 | 30 | M |
|            | T141 | 30 | F |
|            | T142 | 30 | M |
|            | T143 | 30 | F |
|            | T144 | 30 | M |
|            | T145 | 30 | M |
| 31.09.2020 | T146 | 10 | M |
|            | T147 | 30 | F |
|            | T148 | 30 | M |

|            |      |    |   |
|------------|------|----|---|
|            | T149 | 30 | F |
|            | T150 | 24 | M |
|            | T151 | 30 | F |
|            | T152 | 25 | M |
|            | T153 | 30 | F |
|            | T154 | 30 | M |
|            | T155 | 16 | M |
|            | T156 | 30 | F |
|            | T157 | 30 | F |
|            | T158 | 30 | M |
|            | T159 | 30 | F |
| 06.10.2020 | T160 | 30 | M |
|            | T161 | 30 | F |
|            | T162 | 30 | F |
|            | T163 | 30 | M |
|            | T164 | 30 | M |
| 09.10.2020 | T165 | 30 | F |
|            | T166 | 30 | M |
|            | T167 | 30 | F |
|            | T168 | 30 | F |
|            | T169 | 30 | F |
|            | T170 | 30 | M |
|            | T171 | 30 | F |
|            | T172 | 30 | F |
|            | T173 | 12 | F |
|            | T174 | 30 | M |
| 16.10.2020 | T175 | 30 | F |
|            | T176 | 30 | F |
|            | T177 | 30 | M |
|            | T178 | 30 | F |
|            | T179 | 30 | F |
|            | T180 | 30 | F |
|            | T181 | 30 | F |
|            | T182 | 30 | F |
|            | T183 | 30 | F |
|            | T184 | 30 | F |
| 19.10.2020 | T185 | 30 | F |
|            | T186 | 30 | F |
|            | T187 | 30 | F |
|            | T188 | 30 | F |
|            | T189 | 26 | M |
|            | T190 | 30 | F |
|            | T191 | 30 | F |
|            | T192 | 30 | F |
|            | T193 | 30 | M |
|            | T194 | 30 | F |
| 22.10.2020 | T195 | 30 | M |
|            | T196 | 30 | M |
|            | T197 | 30 | F |
|            | T198 | 30 | F |

|            |      |    |   |
|------------|------|----|---|
|            | T199 | 30 | M |
|            | T200 | 30 | F |
|            | T201 | 30 | F |
|            | T202 | 30 | F |
|            | T203 | 30 | F |
|            | T204 | 30 | F |
|            | T205 | 30 | M |
|            | T206 | 30 | F |
|            | T207 | 22 | M |
| 25.10.2020 | T208 | 29 | F |
|            | T209 | 26 | F |
| 31.10.2020 | T210 | 30 | F |
|            | T211 | 30 | F |
|            | T212 | 30 | F |
|            | T213 | 30 | F |
| 01.11.2020 | T214 | 30 | F |
|            | T215 | 25 | M |
|            | T216 | 30 | F |
|            | T217 | 30 | F |
|            | T218 | 28 | M |
|            | T219 | 30 | F |
| 02.11.2020 | T220 | 6  | F |
|            | T221 | 19 | M |
| 03.11.2020 | T222 | 18 | M |
|            | T223 | 15 | M |
|            | T224 | 12 | M |
|            | T225 | 9  | M |
|            | T226 | 3  | F |
|            | T227 | 10 | M |
|            | T228 | 5  | F |
|            | T229 | 2  | M |
